# Supplementary material
Source: MDPI journal article supplement (https://www.mdpi.com/2071-1050/13/10/5645)
Supplement: s1 [file s1]

## Supplementary Materials

**Table S1.** The data set used in this study for ensemble species distribution modelling. The information includes the name of localities, geographical coordinates and origin.

| No. | Name of localities | Latitude/<br>Longitude | Reference | No. | Name of<br>localities | Latitude/<br>Longitude | * Reference |
|-----|--------------------|------------------------|-----------|-----|-----------------------|------------------------|-------------|
| 1   | Ghorighale         | 34.9/46.5              | B, C, G   | 30  | Sardehanan            | 34.98/46.21            | I           |
| 2   | Kavat              | 34.88/46.51            | C, F, G   | 31  | Balebezan             | 35.1/46.2              | I           |
| 3   | Marrakhil          | 35.01/46.13            | C, G      | 32  | Daribar               | 35.16/46.36            | I           |
| 4   | Dourisan           | 35.01/46.38            | B, C, G   | 33  | Baneh                 | 36.06/45.96            | I           |
| 5   | Shamshir           | 34.98/46.41            | C, G      | 34  | Shahoo                | 34.91/46.46            | G           |
| 6   | Pave               | 35.05/46.4             | C, G      | 35  | Bayangan              | 34.98/46.21            | G           |
| 7   | Najjar             | 35.1/46.31             | C, G      | 36  | Zali                  | 34.98/46.46            | G           |
| 8   | Darian             | 35.13/46.31            | C, G      | 37  | Khangah               | 35.01/46.33            | G           |
| 9   | Benjun             | 36.55/45.51            | G         | 38  | Mirabad               | 35.05/46.33            | C, G        |
| 10  | Lashkargah         | 35/46.13               | G         | 39  | Selein                | 35.21/46.31            | C, G        |
| 11  | Nosme              | 35/46.36               | G         | 40  | Hani Garmale          | 35.23/46.13            | G           |
| 12  | Deshe              | 35.06/46.26            | G         | 41  | Novin                 | 35.18/46.35            | G           |
| 13  | Gholani            | 34.9/46.45             | G         | 42  | Balkha                | 35.2/46.15             | A, E        |
| 14  | Hajj               | 35.16/46.35            | G         | 43  | Tawale                | 35.18/46.18            | A, E        |
| 15  | Nowsood            | 35.16/46.2             | F         | 44  | Siyah Guvez           | 35.78/45.78            | E           |
| 16  | Nilan              | 35.15/46.31            | G         | 45  | Garmik                | 35.71/45.76            | E           |
| 17  | Gola               | 35.78/45.83            | E         | 46  | Naav                  | 35.16/46.35            | G           |
| 18  | Nowdeshe           | 35.18/46.23            | G         | 47  | Saqez                 | 36.05/46.03            | G           |
| 19  | Biyara             | 35.21/46.11            | E         | 48  | Razgeh                | 36.05/45.51            | G           |
| 20  | Sargate            | 35.28/46.1             | H         | 49  | Shalmash              | 36.08/45.48            | G           |

|    |                   |             |      |    |           |             |   |
|----|-------------------|-------------|------|----|-----------|-------------|---|
| 21 | Ahmadawa          | 35.3/46.06  | E, H | 50 | Baskedo   | 36.15/45.48 | G |
| 22 | Mawat - Isawa     | 35.93/45.38 | H    | 51 | Basak     | 35.55/45.71 | E |
| 23 | Halsho            | 36.2/45.26  | H    | 52 | Miri Sour | 35.71/45.25 | J |
| 24 | Hero              | 36.11/45.28 | H    | 53 | Penjwin   | 35.6/45.96  | E |
| 25 | Qara and Abubakra | 36.4/45.05  | H    | 54 | Zardoii   | 35/46.26    | K |
| 26 | Jivar             | 35.21/46.31 | C, G | 55 | Dizawar   | 35.2/46.2   | K |
| 27 | Kani Bard         | 36.05/45.63 | I    | 56 | Khurnawa  | 35.06/46.31 | K |
| 28 | Sonch             | 36.03/45.98 | I    | 57 | Daranisha | 35.03/46.36 | K |
| 29 | Serke             | 34.91/46.46 | I    |    |           |             |   |

---

\* A) Nestrov 1916 [1]; B) Schmidler and Schmidler 1975 [2]; C) Sharifi and Assadian 2004 [3]; D) Najafimajd and Kaya 2010 [4]; E) Schneider and Schneider 2011 [5]; F) Naderi 2012 [6]; G) Afroosheh et al. 2016 [7]; H) Al-Sheikhly et al. 2013 [8]; I) Rastegar-Pouyani et al. 2015 [9]; J) Zarei et al. 2017 [10]; K) Mawloudi et al. 2019 [11].

---

**Table S2.** A brief description of the exclusionary criteria used in siting procedure.

| Exclusionary criteria           |                                                                                                                                                                                                                                                                                                                                                                        |
|---------------------------------|------------------------------------------------------------------------------------------------------------------------------------------------------------------------------------------------------------------------------------------------------------------------------------------------------------------------------------------------------------------------|
| Mains roads                     | Various studies have shown that roads can have a significant impact on amphibian mortality [12–14]. Roads, on the other hand, lead to reduced connectivity through fragmentation of amphibian habitats and to reduced genetic diversity among populations [15–17].                                                                                                     |
| Cities and high village density | Urbanization affects the distribution and abundance of amphibians [18]. It is also considered as an influential factor in reducing amphibians through the effect on habitat use relative to urbanization, movement patterns, life-history stages, breeding habitats [19,20]. Urbanization reduces genetic diversity among populations by fragmenting habitats [21,22]. |
| Dam reservoir                   | The richness and abundance, as well as the survival and breeding habitat of amphibians, are affected by dams [23,24] through habitat fragmentation and ecosystem losses [24].                                                                                                                                                                                          |
| Unsuitable vegetation cover     | The composition and structure of vegetation cover in the terrestrial environment increases the success of reproduction for amphibians and recruitment in the aquatic habitat [25–27].                                                                                                                                                                                  |
| Agricultural landscapes         | Agricultural landscapes declined amphibians by pond loss as well as by affecting reducing population connectivity [28]. Also, fertilizers and pesticides used in agriculture have a significant effect on the survival and reproductive capacity that following by reducing the population of amphibians [29,30].                                                      |
| High ridge density              | Mountains, especially very high altitudes, act as barriers to different populations of amphibians and impede gene flow [31,32].                                                                                                                                                                                                                                        |
| Low stream density              | Amphibians need the aquatic environment in the larval stage and breeding season, so droughts due to climate change, urban development, or agricultural use have a significant impact on declining amphibians [28,33,34].                                                                                                                                               |

**Table S3.** A brief description of the non-exclusionary criteria used in siting procedure.

| Non-exclusionary criteria                              |                                                                                                                                                                                                                                                                                                                                                                                                                                                                                                                                                                                                                  |
|--------------------------------------------------------|------------------------------------------------------------------------------------------------------------------------------------------------------------------------------------------------------------------------------------------------------------------------------------------------------------------------------------------------------------------------------------------------------------------------------------------------------------------------------------------------------------------------------------------------------------------------------------------------------------------|
| Number of newt localities                              | The greater the number of known habitats of the PAs appears more favourable [35].                                                                                                                                                                                                                                                                                                                                                                                                                                                                                                                                |
| NPAs connectivity                                      | Populations need to disperse between different habitats to maintain their genetic diversity and prevent inbreeding [36]. Climate change, on the other hand, may lead to shifts in the range of species distribution, so that they may need the closest suitable habitat. Nearest-neighbour distance is the simplest way to measure species dispersal abilities, patch connectivity, and other scaling parameters [37].                                                                                                                                                                                           |
| NPAs size (Km <sup>2</sup> )                           | Today, the theory of island biogeography is used to design parks and PAs [38]. According to this theory, as the size of a park or PAs increases, the number of species increases, and the probability of species extinction decreases [39–41]. In small and enclosed areas, the possibility of dispersal and establishing new species decreases due to barriers, and also, the rate of species extinction increases with the decreasing area. Therefore, larger areas have a comparative advantage in designing PAs [42–44].                                                                                     |
| NPAs shape (edge effect)                               | The shape of the PAs should be such that it is minimized in contact with the outside environment and the impact of external disturbances in the area (for example, human activities); [45]. By minimizing a combination of PAs boundary length and cost, we can create efficient and compact reserve systems. Because the long thin shape PAs with high edge-to-area ratios is sensitive to edge effects [46].                                                                                                                                                                                                   |
| Climate change: NPAs future habitat suitability (2070) | Various studies confirm the negative effects of climate change on amphibians [47,48]. Climate changes shifted amphibian ranges [49,50]. Climate changes may affect dispersal capabilities [51], reproduction [52], development [52], and survival [53]. Besides, climate change can change amphibian habitats including hydrology [54], soil, and vegetation [55]. Climate change can impact competitive interactions which can alter community structure, predator-prey relationships, and food availability. Climate change dramatically influences diseases [56] and modifies pathogen-host dynamics [55,57]. |
| Genetic diversity (Nd)                                 | IUCN emphasizes the conservation of populations with high genetic diversity [58]. Reduction of genetic diversity is associated with inbreeding, and on the other hand, inbreeding reduces reproductive fitness [59,60].                                                                                                                                                                                                                                                                                                                                                                                          |
| Distance to nearest PAs (Km)                           | Connectivity between PAs is essential for ecological and evolutionary processes such as species range shift, migration, and gene flow [61]. These processes are vital for living populations in response to climate and landscape change [62–64]. Establishing connectivity between PAs areas is an essential priority of management and conservation programs of biodiversity [65–67].                                                                                                                                                                                                                          |

**Table S4.** Habitat areas (Km<sup>2</sup>) of the Yellow-spotted mountain newt, *Neurergus derjugini*, according to different classifications and recent and future (2050 and 2070) periods under two optimistic (RCP 2.6) and pessimistic (RCP 8.5) scenarios within the MRI-CGCM3 and CCSM4 models in western Iran and northeastern Iraq.

| Model     | Class (%) | Recent   | Future (2050) |           | Potential<br>impacts | Future (2070) |           | Potential<br>impacts |
|-----------|-----------|----------|---------------|-----------|----------------------|---------------|-----------|----------------------|
|           |           |          | (RCP 2.6)     | (RCP 8.5) |                      | (RCP 2.6)     | (RCP 8.5) |                      |
| MRI-CGCM3 | 0-25      | 71336.80 | 69461.80      | 38003.47  | -/-                  | 72083.33      | 62204.86  | +/-                  |
|           | 25-50     | 13888.88 | 13281.25      | 47986.11  | -/-                  | 15486.11      | 25659.72  | +/+                  |
|           | 50-75     | 8298.61  | 12829.86      | 13211.80  | +/+                  | 10555.22      | 14409.72  | +/+                  |
|           | 75-100    | 13333.33 | 11284.72      | 7656.25   | -/-                  | 8732.63       | 4583.33   | -/-                  |
| CCSM4     | 0-25      | 69618.05 | 67968.75      | 60520.83  | -/-                  | 69054.13      | 60798.61  | -/-                  |
|           | 25-50     | 8281.25  | 10902.77      | 28072.91  | +/+                  | 10329.86      | 27187.50  | -/-                  |
|           | 50-75     | 8576.38  | 15329.86      | 15711.80  | +/+                  | 11319.44      | 10677.08  | +/+                  |
|           | 75-100    | 20381.94 | 12658.25      | 2552.08   | -/-                  | 16163.19      | 8194.44   | -/-                  |

**Table S5.** The no-exclusionary criteria and their relative suitability obtained from 13 rating curves.

| Criterion                                            | A pattern of rating curve | Grading values                                                        |
|------------------------------------------------------|---------------------------|-----------------------------------------------------------------------|
| 1 Number of newt localities                          | Linear                    | 1=12; 0.50=5; 0.40=4; 0.30=3; 0.20=2; 0.10=1; 0=0                     |
| 2 NPAs HS (%): MRI-CGCM3: RCP85 - 2070               | Categorical               | 1=75-100; 0.70=50-75; 0.40=25-50; 0=0-25                              |
| 3 NPAs HS (%): CCSM4: RCP85 - 2070                   | Categorical               | 1=75-100; 0.70=50-75; 0.40=25-50; 0=0-25                              |
| 4 NPAs shape (edge effect)                           | Linear                    | 1=1.03-1.10; 0.75= 1.11-1.20; 0.50= 1.21-1.30; 0.25= 1.31-2.12        |
| 5 NPAs size (Km <sup>2</sup> )                       | Linear                    | 0.25=0-50; 0.50=50-100; 0.75=100-200; 1=200-300                       |
| 6 NPAs connectivity: nearest neighbour distance (Km) | Linear                    | 1=56-68; 0.75=69-81; 0.50=82-94; 0.25=95-107                          |
| 7 HS (%): MRI-CGCM3: RCP26 - 2070                    | Categorical               | 1=75-100; 0.70=50-75; 0.40=25-50; 0=0-25                              |
| 8 HS (%): CCSM4: RCP26 - 2070                        | Categorical               | 1=75-100; 0.70=50-75; 0.40=25-50; 0=0-25                              |
| 9 Genetic diversity (Nd)                             | Categorical               | southern region= 0.60; northern region=0.40                           |
| 10 Distance to other PAs (Km)                        | Linear                    | 0.25=72-91; 0.50=52-71; 0.75=32-51; 1=12-31                           |
| 11 Village density (Km <sup>2</sup> )                | Linear                    | 0=0.72-1.35; 0.25=0.41-0.72; 0.50=0.20-0.41; 0.75=0.08-0.20; 1=0-0.08 |
| 12 Distance to cities                                | Linear                    | 0=0-2; 0.25=2-4; 0.50=4-6; 0.75=6-8; 1=8-10-1                         |
| 13 Distance to the main road                         | Linear                    | 0.25=0-25; 0.50=5-10; 0.75=10-20; 1=20-30                             |

**Table S6.** Weight of 13 non-exclusionary criteria result of the pair-wise comparison.

|    | Criterion                                          | Weights |
|----|----------------------------------------------------|---------|
| 1  | Number of newt localities                          | 0.17    |
| 2  | NPAs HS (%): MRI-CGCM3: RCP85 - 2070               | 0.15    |
| 3  | NPAs HS (%): CCSM4: RCP85 - 2070                   | 0.12    |
| 4  | NPAs shape (edge effect)                           | 0.11    |
| 5  | NPAs size (Km <sup>2</sup> )                       | 0.09    |
| 6  | NPAs connectivity: nearest neighbour distance (Km) | 0.08    |
| 7  | NPAs HS (%): MRI-CGCM3: RCP26 - 2070               | 0.07    |
| 8  | NPAs HS (%): CCSM4: RCP26 - 2070                   | 0.06    |
| 9  | Genetic diversity (Nd)                             | 0.05    |
| 10 | Distance to nearest PAs (Km)                       | 0.04    |
| 11 | Village density (Km <sup>2</sup> )                 | 0.03    |
| 12 | Distance to cities                                 | 0.02    |
| 13 | Distance to the main road                          | 0.01    |

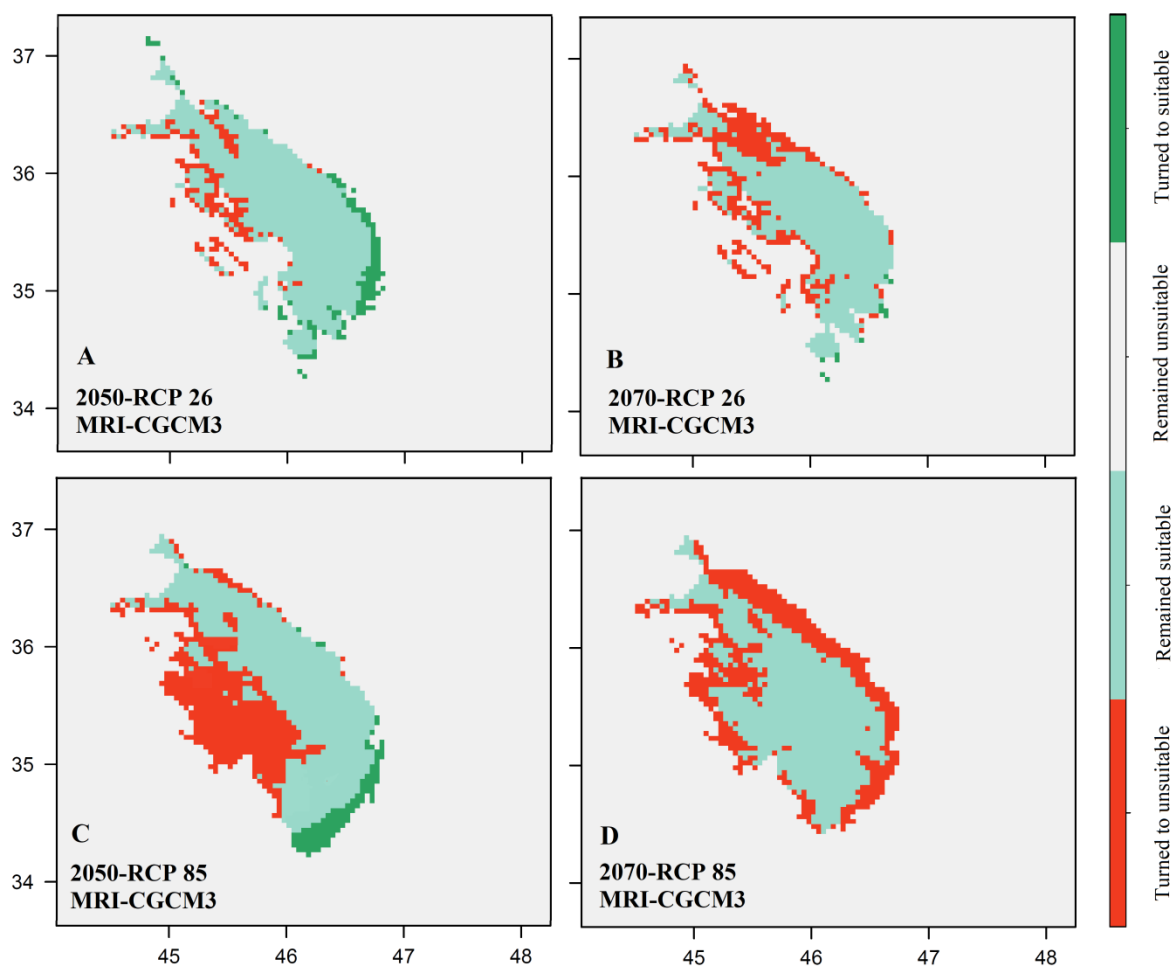

**Figure S1.** Species range change of *Neurergus derjugini* in currently suitable habitats (gain/loss) by 2050 and 2070 under two optimistic (RCP26) and pessimistic (RCP85) scenarios within the MRI-CGCM3 model in western Iran and northeastern Iraq.



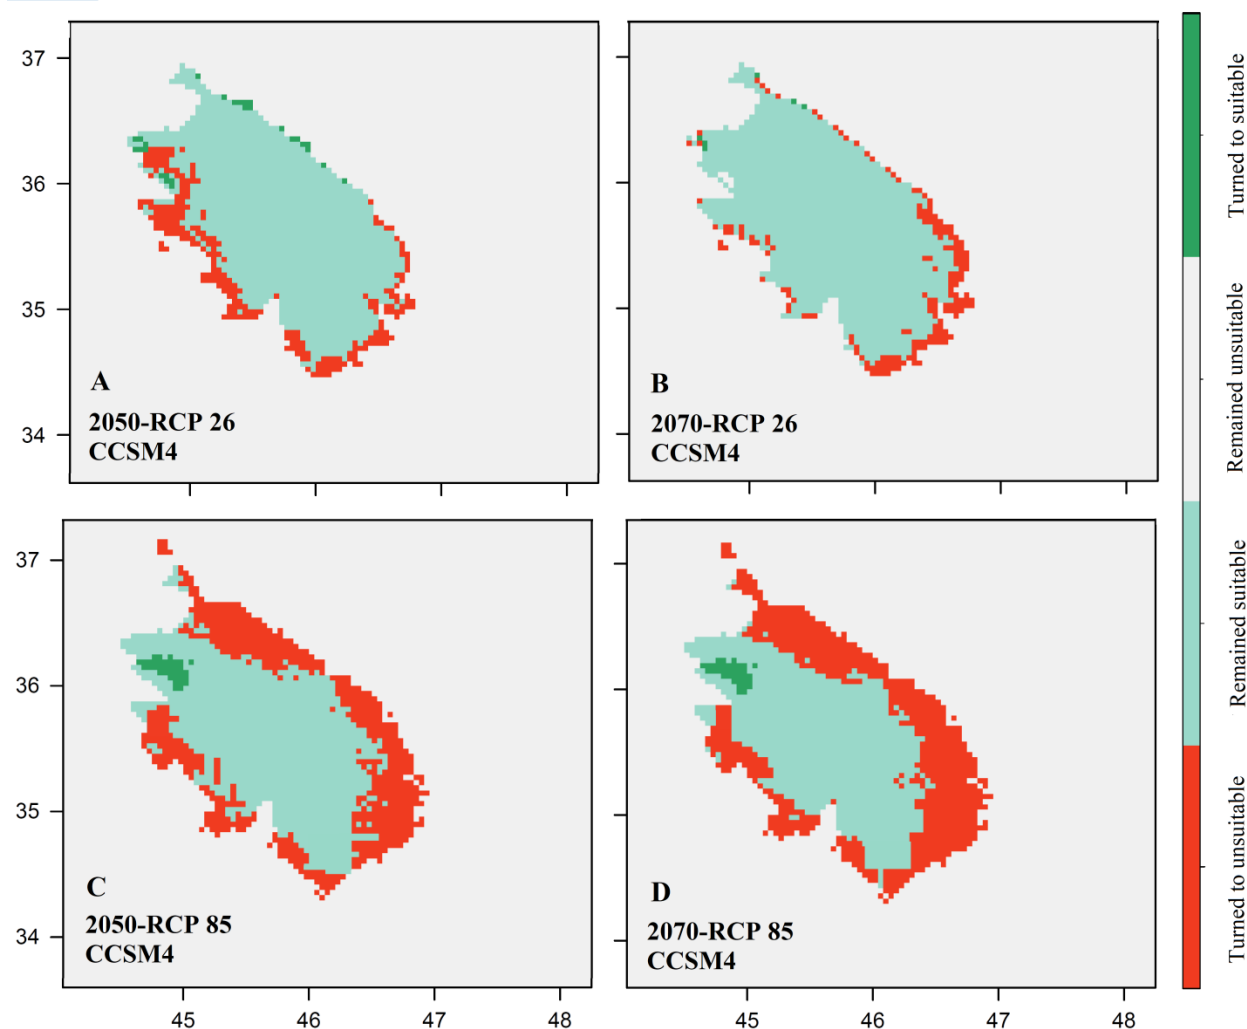

**Figure S2.** Species range change of *Neurergus derjugini* in currently suitable habitats (gain/loss) by 2050 and 2070 under two optimistic (RCP26) and pessimistic (RCP85) scenarios within the CCSM4 model in western Iran and northeastern Iraq.

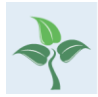

**Scripts S1.** The scripts used in the biomod2 settings.

```
## setup environment ----
setwd('workdir')
## install the latest release of biomod2
devtools::install_github('biomodhub/biomod2')
## load the required packages
library(biomod2)
library(ggplot2)
library(gridExtra)
library(raster)
library(rasterVis)
## read data ----
derjugini_occ <- read.csv('../data/derjugini_occ.csv')
summary(derjugini_occ)
bioclim_ND_sub <-
  raster::stack(
    c(
      bio_1 = '../data/worldclim_ND/worldclim_ND_bio_1.asc',
      bio_2 = '../data/worldclim_ND/worldclim_ND_bio_2.asc',
      bio_4 = '../data/worldclim_ND/worldclim_ND_bio_4.asc',
      bio_12 = '../data/worldclim_ND/worldclim_ND_bio_12.asc',
      bio_13 = '../data/worldclim_ND/worldclim_ND_bio_13.asc',
      bio_14 = '../data/worldclim_ND/worldclim_ND_bio_18.asc'
    )
  )

bioclim_ND_sub

## format the data ----
derjugini_data <-
  BIOMOD_FormatingData(
    resp.var = derjugini_occ['neurergus.derjugini'],
    resp.xy = derjugini_occ[, c('long', 'lat')],
    expl.var = bioclim_ND_sub,
    resp.name = "neurergus.derjugini",
    PA.nb.rep = 10,
    PA.nb.absences = 57,
    PA.strategy = ' random '
  )

## formatted object summary
derjugini_data

## plot of selected pseudo-absences
plot(derjugini_data)

## define individual models options ----
derjugini_opt <-
  BIOMOD_ModelingOptions(
    GLM = list(type = 'quadratic', interaction.level = 1),
    GBM = list(n.trees = 1000),
    CTA = list(CV.tree = 50),
    ANN = list(CV.ann = 5),
    SRE = list(quant=0.025)
  )

## run the individual models ----
derjugini_models <-
```



```
BIOMOD_Modeling(  
  data = derjugini_data,  
  models = c("GLM", "GBM", "RF", "CTA", "ANN", "SRE", "FDA", "MARS"),  
  models.options = derjugini_opt,  
  NbRunEval = 10,  
  DataSplit = 80,  
  VarImport = 3,  
  modeling.id = "demo1"  
)  
  
## asses individual models quality ----  
  
## get models evaluation scores  
derjugini_models_scores <- get_evaluations(derjugini_models)  
  
## derjugini_models_scores is a 5 dimension array containing the scores of the models  
dim(derjugini_models_scores)  
dimnames(derjugini_models_scores)  
  
## plot models evaluation scores  
models_scores_graph(  
  derjugini_models,  
  by = "models",  
  metrics = c("ROC", "TSS", "KAPPA"),  
  xlim = c(0.5, 1),  
  ylim = c(0.5, 1)  
)  
  
models_scores_graph(  
  derjugini_models,  
  by = "cv_run",  
  metrics = c("ROC", "TSS", "KAPPA"),  
  xlim = c(0.5, 1),  
  ylim = c(0.5, 1)  
)  
  
models_scores_graph(  
  derjugini_models,  
  by = "data_set",  
  metrics = c("ROC", "TSS", "KAPPA"),  
  xlim = c(0.5, 1),  
  ylim = c(0.5, 1)  
)  
  
## check variable importance  
(derjugini_models_var_import <- get_variables_importance(derjugini_models))  
  
## make the mean of variable importance by algorithm  
apply(derjugini_models_var_import, c(1, 2), mean)  
  
## individual models response plots  
derjugini_glm <- BIOMOD_LoadModels(derjugini_models, models='GLM')  
derjugini_gbm <- BIOMOD_LoadModels(derjugini_models, models='GBM')  
derjugini_randomForest <- BIOMOD_LoadModels(derjugini_models, models='RF')  
derjugini_rpart <- BIOMOD_LoadModels(derjugini_models, models='CTA')  
derjugini_nnet <- BIOMOD_LoadModels(derjugini_models, models='ANN')  
derjugini_sre <- BIOMOD_LoadModels(derjugini_models, models='SRE')  
derjugini_fda <- BIOMOD_LoadModels(derjugini_models, models='FDA')  
derjugini_earth <- BIOMOD_LoadModels(derjugini_models, models='MARS')
```



```
glm_eval_strip <-  
  biomod2::response.plot2(  
    models = derjugini_glm,  
    Data = get_formal_data(derjugini_models,'expl.var'),  
    show.variables= get_formal_data(derjugini_models,'expl.var.names'),  
    do.bivariate = FALSE,  
    fixed.var.metric = 'median',  
    legend = FALSE,  
    display_title = FALSE,  
    data_species = get_formal_data(derjugini_models,'resp.var')  
  )
```

```
gbm_eval_strip <-  
  biomod2::response.plot2(  
    models = derjugini_gbm,  
    Data = get_formal_data(derjugini_models,'expl.var'),  
    show.variables= get_formal_data(derjugini_models,'expl.var.names'),  
    do.bivariate = FALSE,  
    fixed.var.metric = 'median',  
    legend = FALSE,  
    display_title = FALSE,  
    data_species = get_formal_data(derjugini_models,'resp.var')  
  )
```

```
rf_eval_strip <-  
  biomod2::response.plot2(  
    models = derjugini_rf,  
    Data = get_formal_data(derjugini_models,'expl.var'),  
    show.variables= get_formal_data(derjugini_models,'expl.var.names'),  
    do.bivariate = FALSE,  
    fixed.var.metric = 'median',  
    legend = FALSE,  
    display_title = FALSE,  
    data_species = get_formal_data(derjugini_models,'resp.var')  
  )
```

```
cta_eval_strip <-  
  biomod2::response.plot2(  
    models = derjugini_rpart,  
    Data = get_formal_data(derjugini_models,'expl.var'),  
    show.variables= get_formal_data(derjugini_models,'expl.var.names'),  
    do.bivariate = FALSE,  
    fixed.var.metric = 'median',  
    legend = FALSE,  
    display_title = FALSE,  
    data_species = get_formal_data(derjugini_models,'resp.var')  
  )
```

```
ann_eval_strip <-  
  biomod2::response.plot2(  
    models = derjugini_nnet,  
    Data = get_formal_data(derjugini_models,'expl.var'),  
    show.variables= get_formal_data(derjugini_models,'expl.var.names'),  
    do.bivariate = FALSE,  
    fixed.var.metric = 'median',  
    legend = FALSE,  
    display_title = FALSE,  
    data_species = get_formal_data(derjugini_models,'resp.var')  
  )
```



```
sre_eval_strip <-  
  biomod2::response.plot2(  
    models = derjugini_sre,  
    Data = get_formal_data(derjugini_models,'expl.var'),  
    show.variables= get_formal_data(derjugini_models,'expl.var.names'),  
    do.bivariate = FALSE,  
    fixed.var.metric = 'median',  
    legend = FALSE,  
    display_title = FALSE,  
    data_species = get_formal_data(derjugini_models,'resp.var')  
  )  
  
fda_eval_strip <-  
  biomod2::response.plot2(  
    models = derjugini_fda,  
    Data = get_formal_data(derjugini_models,'expl.var'),  
    show.variables= get_formal_data(derjugini_models,'expl.var.names'),  
    do.bivariate = FALSE,  
    fixed.var.metric = 'median',  
    legend = FALSE,  
    display_title = FALSE,  
    data_species = get_formal_data(derjugini_models,'resp.var')  
  )  
  
mars_eval_strip <-  
  biomod2::response.plot2(  
    models = derjugini_earth,  
    Data = get_formal_data(derjugini_models,'expl.var'),  
    show.variables= get_formal_data(derjugini_models,'expl.var.names'),  
    do.bivariate = FALSE,  
    fixed.var.metric = 'median',  
    legend = FALSE,  
    display_title = FALSE,  
    data_species = get_formal_data(derjugini_models,'resp.var')  
  )  
  
## run the ensemble models ----  
derjugini_ensemble_models <-  
  BIOMOD_EnsembleModeling(  
    modeling.output = derjugini_models,  
    em.by = 'all',  
    eval.metric = 'TSS',  
    eval.metric.quality.threshold = 0.8,  
    models.eval.meth = c('TSS','ROC','KAPPA'),  
    prob.mean = FALSE,  
    prob.cv = TRUE,  
    committee.averaging = TRUE,  
    prob.mean.weight = TRUE,  
    VarImport = 0  
  )  
  
## asses ensemble models quality ----  
(derjugini_ensemble_models_scores <- get_evaluations(derjugini_ensemble_models))  
  
## do models projections ----  
  
## current projections  
derjugini_models_proj_current <-  
  BIOMOD_Projection(  
    modeling.output = derjugini_models,
```



```
new.env = bioclim_ND_sub,
proj.name = "current",
binary.meth = "TSS",
output.format = ".img",
do.stack = FALSE
)

derjugini_ensemble_models_proj_current <-
BIOMOD_EnsembleForecasting(
  EM.output = derjugini_ensemble_models,
  projection.output = derjugini_models_proj_current,
  binary.meth = "TSS",
  output.format = ".img",
  do.stack = FALSE
)

## future projections

## load 2050_BC26 bioclim variables
bioclim_ND_2050_BC26 <-
stack(
  c(
    bio_1 = '../data/worldclim_ND/worldclim_ND_2050_BC26_bio_1.asc',
    bio_2 = '../data/worldclim_ND/worldclim_ND_2050_BC26_bio_2.asc',
    bio_4 = '../data/worldclim_ND/worldclim_ND_2050_BC26_bio_4.asc',
    bio_12 = '../data/worldclim_ND/worldclim_ND_2050_BC26_bio_12.asc',
    bio_13 = '../data/worldclim_ND/worldclim_ND_2050_BC26_bio_13.asc',
    bio_14 = '../data/worldclim_ND/worldclim_ND_2050_BC26_bio_14.asc'
  )
)

derjugini_models_proj_2050_BC26 <-
BIOMOD_Projection(
  modeling.output = derjugini_models,
  new.env = bioclim_ND_2050_BC26,
  proj.name = "2050_BC26",
  binary.meth = "TSS",
  output.format = ".img",
  do.stack = FALSE
)

derjugini_ensemble_models_proj_2050_BC26 <-
BIOMOD_EnsembleForecasting(
  EM.output = derjugini_ensemble_models,
  projection.output = derjugini_models_proj_2050_BC26,
  binary.meth = "TSS",
  output.format = ".img",
  do.stack = FALSE
)

## load 2050_BC85 bioclim variables
bioclim_ND_2050_BC85 <-
stack(
  c(
    bio_1 = '../data/worldclim_ND/worldclim_ND_2050_BC85_bio_1.asc',
    bio_2 = '../data/worldclim_ND/worldclim_ND_2050_BC85_bio_2.asc',
    bio_4 = '../data/worldclim_ND/worldclim_ND_2050_BC85_bio_4.asc',
    bio_12 = '../data/worldclim_ND/worldclim_ND_2050_BC85_bio_12.asc',
```



```
bio_13 = '../data/worldclim_ND/worldclim_ND_2050_BC85_bio_13.asc',
bio_14 = '../data/worldclim_ND/worldclim_ND_2050_BC85_bio_14.asc'
)
)

derjugini_models_proj_2050_BC85 <-
BIOMOD_Projection(
  modeling.output = derjugini_models,
  new.env = bioclim_ND_2050_BC85,
  proj.name = "2050_BC85",
  binary.meth = "TSS",
  output.format = ".img",
  do.stack = FALSE
)

derjugini_ensemble_models_proj_2050_BC85 <-
BIOMOD_EnsembleForecasting(
  EM.output = derjugini_ensemble_models,
  projection.output = derjugini_models_proj_2050_BC85,
  binary.meth = "TSS",
  output.format = ".img",
  do.stack = FALSE
)

## load 2070_BC26 bioclim variables
bioclim_ND_2070_BC26 <-
stack(
  c(
    bio_1 = '../data/worldclim_ND/worldclim_ND_2070_BC26_bio_1.asc',
    bio_2 = '../data/worldclim_ND/worldclim_ND_2070_BC26_bio_2.asc',
    bio_4 = '../data/worldclim_ND/worldclim_ND_2070_BC26_bio_4.asc',
    bio_12 = '../data/worldclim_ND/worldclim_ND_2070_BC26_bio_12.asc',
    bio_13 = '../data/worldclim_ND/worldclim_ND_2070_BC26_bio_13.asc',
    bio_14 = '../data/worldclim_ND/worldclim_ND_2070_BC26_bio_14.asc'
  )
)

derjugini_models_proj_2070_BC26 <-
BIOMOD_Projection(
  modeling.output = derjugini_models,
  new.env = bioclim_ND_2070_BC26,
  proj.name = "2070_BC26",
  binary.meth = "TSS",
  output.format = ".img",
  do.stack = FALSE
)

derjugini_ensemble_models_proj_2070_BC26 <-
BIOMOD_EnsembleForecasting(
  EM.output = derjugini_ensemble_models,
  projection.output = derjugini_models_proj_2070_BC26,
  binary.meth = "TSS",
  output.format = ".img",
  do.stack = FALSE
)

## load 2070_BC85 bioclim variables
bioclim_ND_2070_BC85 <-
stack(
```



```

c(
  bio_1 = '../data/worldclim_ND/worldclim_ND_2070_BC85_bio_1.asc',
  bio_2 = '../data/worldclim_ND/worldclim_ND_2070_BC85_bio_2.asc',
  bio_4 = '../data/worldclim_ND/worldclim_ND_2070_BC85_bio_4.asc',
  bio_12 = '../data/worldclim_ND/worldclim_ND_2070_BC85_bio_12.asc',
  bio_13 = '../data/worldclim_ND/worldclim_ND_2070_BC85_bio_13.asc',
  bio_14 = '../data/worldclim_ND/worldclim_ND_2070_BC85_bio_14.asc'
)
)

derjugini_models_proj_2070_BC85 <-
BIOMOD_Projection(
  modeling.output = derjugini_models,
  new.env = bioclim_ND_2070_BC85,
  proj.name = "2070_BC85",
  binary.meth = "TSS",
  output.format = ".img",
  do.stack = FALSE
)

derjugini_ensemble_models_proj_2070_BC85 <-
BIOMOD_EnsembleForecasting(
  EM.output = derjugini_ensemble_models,
  projection.output = derjugini_models_proj_2070_BC85,
  binary.meth = "TSS",
  output.format = ".img",
  do.stack = FALSE
)

## check how projections looks like
plot(derjugini_ensemble_models_proj_2050_BC26, str.grep = "EMca|EMwmean")
plot(derjugini_ensemble_models_proj_2050_BC85, str.grep = "EMca|EMwmean")
plot(derjugini_ensemble_models_proj_2070_BC26, str.grep = "EMca|EMwmean")
plot(derjugini_ensemble_models_proj_2070_BC85, str.grep = "EMca|EMwmean")

## compute Species Range Change (SRC) ----
## load binary projections
derjugini_bin_proj_current <-
stack(
  c(
    ca = "neuregus.derjugini/proj_current/individual_projections/neuregus.derjugini_EMcaByTSS_mergedAlgo_mergedRun_mergedData_TSSbin.img",
    wm
  )
  "neuregus.derjugini/proj_current/individual_projections/neuregus.derjugini_EMwmeanByTSS_mergedAlgo_mergedRun_mergedData_TSSbin.img"
)

derjugini_bin_proj_2050_BC26 <-
stack(
  c(
    ca = "neuregus.derjugini/proj_2050_BC26/individual_projections/neuregus.derjugini_EMcaByTSS_mergedAlgo_mergedRun_mergedData_TSSbin.img",
    wm
  )
  "neuregus.derjugini/proj_2050_BC26/individual_projections/neuregus.derjugini_EMwmeanByTSS_mergedAlgo_mergedRun_mergedData_TSSbin.img"
)

derjugini_bin_proj_2050_BC85 <-
stack(
  c(
    ca = "neuregus.derjugini/proj_2050_BC85/individual_projections/neuregus.derjugini_EMcaByTSS_mergedAlgo_mergedRun_mergedData_TSSbin.img",

```



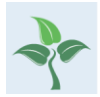

```
      wm
      "neuregus.derjugini/proj_2050_BC85/individual_projections/neuregus.derjugini_EMwmeanByTSS_mergedAlgo_mergedRun_mergedData_TSSbin.img"
    )
  )

derjugini_bin_proj_2070_BC26 <-
  stack(
    c(
      ca = "neuregus.derjugini/proj_2070_BC26/individual_projections/neuregus.derjugini_EMcaByTSS_mergedAlgo_mergedRun_mergedData_TSSbin.img",
      wm
      "neuregus.derjugini/proj_2070_BC26/individual_projections/neuregus.derjugini_EMwmeanByTSS_mergedAlgo_mergedRun_mergedData_TSSbin.img"
    )
  )

derjugini_bin_proj_2070_BC85 <-
  stack(
    c(
      ca = "neuregus.derjugini/proj_2070_BC85/individual_projections/neuregus.derjugini_EMcaByTSS_mergedAlgo_mergedRun_mergedData_TSSbin.img",
      wm
      "neuregus.derjugini/proj_2070_BC85/individual_projections/neuregus.derjugini_EMwmeanByTSS_mergedAlgo_mergedRun_mergedData_TSSbin.img"
    )
  )

## SRC current -> 2050
SRC_current_2050_BC26 <-
  BIOMOD_RangeSize(
    derjugini_bin_proj_current,
    derjugini_bin_proj_2050_BC26
  )

SRC_current_2050_BC26$Compt.By.Models

## SRC current -> 2050
SRC_current_2050_BC85 <-
  BIOMOD_RangeSize(
    derjugini_bin_proj_current,
    derjugini_bin_proj_2050_BC85
  )

SRC_current_2050_BC85$Compt.By.Models

## SRC current -> 2070
SRC_current_2070_BC26 <-
  BIOMOD_RangeSize(
    derjugini_bin_proj_current,
    derjugini_bin_proj_2070_BC26
  )

SRC_current_2070_BC26$Compt.By.Models

## SRC current -> 2070
SRC_current_2070_BC85 <-
  BIOMOD_RangeSize(
    derjugini_bin_proj_current,
    derjugini_bin_proj_2070_BC85
  )
```

SRC\_current\_2070\_BC85\$Compt.By.Models

```

derjugini_src_map <-
  stack(
    SRC_current_2050_BC26$Diff.By.Pixel,
    SRC_current_2050_BC85$Diff.By.Pixel,
    SRC_current_2070_BC26$Diff.By.Pixel,
    SRC_current_2070_BC85$Diff.By.Pixel
  )
names(derjugini_src_map) <- c("ca cur-2050_BC26", "wm cur-2050_BC26", "ca cur-2050_BC85", "wm cur-2050_BC85", "ca cur-2070_BC26", "wm cur-2070_BC26", "ca cur-2070_BC85", "wm cur-2070_BC85")

my.at <- seq(-2.5, 1.5, 1)
myColorkey <-
  list(
    at = my.at, ## where the colors change
    labels =
      list(
        labels = c("lost", "pres", "abs", "gain"), ## labels
        at = my.at[-1] - 0.5 ## where to print labels
      )
  )

rasterVis::levelplot(
  derjugini_src_map,
  main = "neuregus derjugini range change",
  colorkey = myColorkey,
  col.regions=c('#f03b20', '#99d8c9', '#f0f0f0', '#2ca25f'),
  layout = c(2,2)
)

## compute the stratified density of probabilities on SRC ----
## the reference projection
ref <- subset(derjugini_bin_proj_current, "ca")

## define the facets we want to study
mods <- c("GLM", "GBM", "RF", "CTA", "ANN", "SRE", "FDA", "MARS")
data_set <- c("PA1", "PA2", "PA3", "PA4", "PA5", "PA6", "PA7", "PA8", "PA9", "PA10")
cv_run <- c("RUN1", "RUN2", "RUN3", "RUN4", "RUN5", "RUN6", "RUN7", "RUN8", "RUN9", "RUN10", "Full")

## construct combination of all facets
groups <-
  as.matrix(
    expanderjugini.grid(
      models = mods,
      data_set = data_set,
      cv_run = cv_run,
      stringsAsFactors = FALSE)
  )

## load all projections we have produced
all_bin_proj_files <-
  list.files(
    path = "neuregus.derjugini",
    pattern = "_TSSbin.img$",
    full.names = TRUE,
    recursive = TRUE
  )

```

```
## current versus 2050_BC26 (removed the projections for current, 2050_BC86, 2070_BC26, 2070_BC85)
current_aderjugini_2050_BC26_proj_files <- grep(all_bin_proj_files, pattern="2050_BC26", value=T)
```

```
## current versus 2050_BC85 (removed the projections for current, 2050_BC26, 2050_BC26, 2070_BC85)
current_aderjugini_2050_BC85_proj_files <- grep(all_bin_proj_files, pattern="2050_BC85", value=T)
```

```
## current versus 2070_BC26 (removed the projections for current, 2070_BC86, 2070_BC26, 2070_BC85)
current_aderjugini_2070_BC26_proj_files <- grep(all_bin_proj_files, pattern="2070_BC26", value=T)
```

```
## current versus 2070_BC85 (removed the projections for current, 2070_BC26, 2070_BC26, 2070_BC85)
current_aderjugini_2070_BC85_proj_files <- grep(all_bin_proj_files, pattern="2070_BC85", value=T)
```

```
## keep only projections that match with our selected facets groups
```

```
selected_bin_proj_files <-
  apply(
    groups, 1,
    function(x){
      proj_file <- NA
      match_tab <- sapply(x, grepl, current_aderjugini_2050_BC26_proj_files)
      match_id <- which(apply(match_tab, 1, all))
      if(length(match_id)) proj_file <- current_aderjugini_2050_BC26_proj_files[match_id]
      proj_file
    }
  )
```

```
## keep only projections that match with our selected facets groups
```

```
selected_bin_proj_files <-
  apply(
    groups, 1,
    function(x){
      proj_file <- NA
      match_tab <- sapply(x, grepl, current_aderjugini_2050_BC85_proj_files)
      match_id <- which(apply(match_tab, 1, all))
      if(length(match_id)) proj_file <- current_aderjugini_2050_BC85_proj_files[match_id]
      proj_file
    }
  )
```

```
## keep only projections that match with our selected facets groups
```

```
selected_bin_proj_files <-
  apply(
    groups, 1,
    function(x){
      proj_file <- NA
      match_tab <- sapply(x, grepl, current_aderjugini_2070_BC26_proj_files)
      match_id <- which(apply(match_tab, 1, all))
      if(length(match_id)) proj_file <- current_aderjugini_2070_BC26_proj_files[match_id]
      proj_file
    }
  )
```

```
## keep only projections that match with our selected facets groups
```

```
selected_bin_proj_files <-
  apply(
    groups, 1,
    function(x){
      proj_file <- NA
```

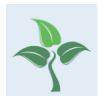

```

match_tab <- supply(x, grepl, current_aderjugini_2070_BC85_proj_files)
match_id <- which(apply(match_tab, 1, all))
if(length(match_id)) proj_file <- current_aderjugini_2070_BC85_proj_files[match_id]
proj_file
}
)

## remove no-matching groups
to_remove <- which(is.na(selected_bin_proj_files))
if(length(to_remove)){
  groups <- groups[-to_remove,]
  selected_bin_proj_files <- selected_bin_proj_files[-to_remove]
}

## build stack of selected projections
proj_groups <- stack(selected_bin_proj_files)

ProbDensFunc(
  initial = as.vector(ref),
  projections = raster::as.matrix(proj_groups),
  groups = t(groups),
  plohist = TRUE,
  resolution = 300,
  cvsn = FALSE
)

```

## References

1. Nesterov, P. Tri novych chvostatych amfibii is kurdistana. *Annu. Du Musée Zool. De L'académie Des. Sci.* **1916**, *21*, 1–30.
2. Schmidler, J.; Schmidler, J. Untersuchungen an westpersischen Bergbachmolchen der Gattung *Neurergus* (Caudata, Salamandridae). *Salamandra* **1975**, *11*, 84–98.
3. Sharifi, M.; Assadian, S. Distribution and conservation status of *Neurergus microspilotus* (Caudata: Salamandridae) in western Iran. *Asiat. Herpetol. Res.* **2004**, *10*, 224–229.
4. Najafimajid, E.; Kaya, U. A newly found locality for the critically endangered Yellow Spotted Newt, *Neurergus microspilotus* (Nesterov, 1917) nourishes hope for its conservation: (Salamandridae: Caudata). *Zool. Middle East.* **2010**, *51*, 51–56.
5. Schneider, C.; Schneider, W. Die Bergbachmolche der Gattung *Neurergus* im Irak. *Herpetozoa* **2011**, *23*, 3–20.
6. Naderi, B. Ecological studies (distribution, conservation status, courtship and foraging behavior) in two species of *Neurergus*. Master's Thesis, Razi University, Kermanshah, Iran, 2012; 74p.
7. Al-Sheikhly, O.; Iyad, A.; Rastegar-Pouyani, N.; Browne, R. New localities of the Kurdistan newt *Neurergus microspilotus* and Lake Urmia newt *Neurergus crocatus* (Caudata: Salamandridae) in Iraq. *Amphib. Reptile Conserv.* **2013**, *6*, 42–49.
8. Rastegar-Pouyani, N.; Mirani, R.; Bahmani, Z.; Karamiani, R.; Takesh, M.; Browne, R. Conservation status of the Kurdistan newt *Neurergus microspilotus* in Kermanshah and Kurdistan provinces, Iran. *Amphib. Reptile Conserv.* **2015**, *9*, 36–41.
9. Zarei, F.; Hosseini, S.N.; Amini, S.S.; Pezeshk, J.; Soofi, M.; Esmaeili, H.R. A new locality of Kurdistan newt, *Neurergus derjugini derjugini* (Nesterov, 1916) represents a large population in Iran: Implication for conservation. *Herpetol. Notes* **2017**, *10*, 611–614.
10. Afroosheh, M.; Akmal, V.; Esmaili, S.; Sharifi, M. Distribution and abundance of the endangered yellow spotted mountain newt *Neurergus microspilotus* (Caudata: Salamandridae) in western Iran. *Herpetol. Conserv. Biol.* **2016**, *11*, 52–60.
11. Mawloudi, S.; Rastegar-Pouyani, N.; Rastegar-Pouyani, E. Four new localities for the Eendangered Kurdistan newt *Neurergus derjugini* (Nesterov, 1916) (Amphibia: Salamandridae) in Kermanshah province, western Iran. *Russ. J. Herpetol.* **2019**, *26*, 235–241.
12. Beebee, T.J. Effects of road mortality and mitigation measures on amphibian populations. *Conserv. Biol.* **2013**, *27*, 657–668.
13. Hels, T.; Buchwald, E. The effect of road kills on amphibian populations. *Biol. Conserv.* **2001**, *99*, 331–340.

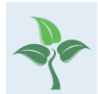

14. Carr, L.W.; Fahrig, L. Effect of road traffic on two amphibian species of differing vagility. *Conserv. Biol.* **2001**, *15*, 1071–1078.
15. de Maynadier, P.G.; Hunter, M.L., Jr. Road effects on amphibian movements in a forested landscape. *Nat. Areas J.* **2000**, *20*, 56–65.
16. Matos, C.; Petrovan, S.; Wheeler, P.; Ward, A. Short-term movements and behaviour govern the use of road mitigation measures by a protected amphibian. *Anim. Conserv.* **2019**, *22*, 285–296.
17. Holderegger, R.; Di Giulio, M. The genetic effects of roads: A review of empirical evidence. *Basic Appl. Ecol.* **2010**, *11*, 522–531.
18. Riley, S.P.; Busteed, G.T.; Kats, L.B.; Vandergon, T.L.; Lee, L.F.; Dagit, R.G.; Kerby, J.L.; Fisher, R.N.; Sauvajot, R.M. Effects of urbanization on the distribution and abundance of amphibians and invasive species in southern California streams. *Conserv. Biol.* **2005**, *19*, 1894–1907.
19. Scheffers, B.R.; Paszkowski, C.A. The effects of urbanization on North American amphibian species: Identifying new directions for urban conservation. *Urban. Ecosyst.* **2012**, *15*, 133–147.
20. Rubbo, M.J.; Kiesecker, J.M. Amphibian breeding distribution in an urbanized landscape. *Conserv. Biol.* **2005**, *19*, 504–511.
21. Fusco, N.A.; Pehek, E.; Munshi-South, J. Urbanization reduces gene flow but not genetic diversity of stream salamander populations in the New York City metropolitan area. *Evol. Appl.* **2021**, *14*, 99–116.
22. Furman, B.L.; Scheffers, B.R.; Taylor, M.; Davis, C.; Paszkowski, C.A. Limited genetic structure in a wood frog (*Lithobates sylvaticus*) population in an urban landscape inhabiting natural and constructed wetlands. *Conserv. Genet.* **2016**, *17*, 19–30.
23. Lind, A.J.; Welsh, H.H.; Wilson, R.A. The effects of a dam on breeding habitat and egg survival of the foothill yellow-legged frog (*Rana boylei*). *Herpetol. Rev.* **1996**, *27*, 62–67.
24. Brandão, R.A.; Araújo, A.F.B. Changes in anuran species richness and abundance resulting from hydroelectric dam flooding in central Brazil. *Biotropica* **2008**, *40*, 263–266.
25. Shulze, C.D.; Semlitsch, R.D.; Trauth, K.M.; Gardner, J.E. Testing wetland features to increase amphibian reproductive success and species richness for mitigation and restoration. *Ecol. Appl.* **2012**, *22*, 1675–1688.
26. Roznik, E.A.; Johnson, S.A. Canopy closure and emigration by juvenile gopher frogs. *J. Wildl. Manag.* **2009**, *73*, 260–268.
27. Binckley, C.A.; Resetarits, W.J. Effects of forest canopy on habitat selection in treefrogs and aquatic insects: Implications for communities and metacommunities. *Oecologia* **2007**, *153*, 951–958.
28. Arntzen, J.W.; Abrahams, C.; Meilink, W.R.; Iosif, R.; Zuiderwijk, A. Amphibian decline, pond loss and reduced population connectivity under agricultural intensification over a 38 year period. *Biodivers. Conserv.* **2017**, *26*, 1411–1430.
29. Isaza, D.F.G.; Cramp, R.L.; Franklin, C.E. Living in polluted waters: A meta-analysis of the effects of nitrate and interactions with other environmental stressors on freshwater taxa. *Environ. Pollut.* **2020**, *261*, 114091.
30. Adams, E.; Leeb, C.; Brühl, C.A. Pesticide exposure affects reproductive capacity of common toads (*Bufo bufo*) in a viticultural landscape. *Ecotoxicology* **2021**, *30*, 213–223.
31. Sánchez-Montes, G.; Wang, J.; Ariño, A.H.; Martínez-Solano, Í. Mountains as barriers to gene flow in amphibians: Quantifying the differential effect of a major mountain ridge on the genetic structure of four sympatric species with different life history traits. *J. Biogeogr.* **2018**, *45*, 318–331.
32. Nali, R.C.; Becker, C.G.; Zamudio, K.R.; Prado, C.P. Topography, more than land cover, explains genetic diversity in a Neotropical savanna tree frog. *Divers. Distrib.* **2020**, *26*, 1798–1812.
33. Walls, S.C.; Barichivich, W.J.; Brown, M.E. Drought, deluge and declines: The impact of precipitation extremes on amphibians in a changing climate. *Biology* **2013**, *2*, 399–418.
34. Czeplédi, I.; Kern, B.; Tóth, R.; Seress, G.; Erős, T. Impacts of urbanization on stream fish assemblages: The role of the species pool and the local environment. *Front. Ecol. Evol.* **2020**, *8*, 1–10.
35. Vaissi, S.; Sharifi, M. Integrating multi-criteria decision analysis with a GIS-based siting procedure to select a protected area for the Kaiser's mountain newt, *Neurergus kaiseri* (Caudata: Salamandridae). *Glob. Ecol. Conserv.* **2019**, *20*, e00738.
36. Melosik, I.; Baraniak, E.; Przewoźny, M.; Grzegorzczak, T.; Rzepka, M. Does gene flow balance the effect of habitat fragmentation in a population of the hermit beetle *Osmoderma barnabita*? *Insect Conserv. Divers.* **2020**, *13*, 360–373.
37. Prugh, L.R. An evaluation of patch connectivity measures. *Ecol. Appl.* **2009**, *19*, 1300–1310.
38. MacArthur, R.H.; Wilson, E.O. *The Theory of Island Biogeography*; Princeton University Press: Princeton, NJ, USA, 1967; p. 203.
39. Chape, S.; Harrison, J.; Spalding, M.; Lysenko, I. Measuring the extent and effectiveness of protected areas as an indicator for meeting global biodiversity targets. *Philos. Trans. R. Soc. B Biol. Sci.* **2005**, *360*, 443–455.

40. Lomolino, M. A call for a new paradigm of island biogeography. *Glob. Ecol. Biogeogr.* **2000**, *9*, 1–6.
41. Soulé, M.E.; Simberloff, D. What do genetics and ecology tell us about the design of nature reserves? *Biol. Conserv.* **1986**, *35*, 19–40.
42. Hortal, J.; Triantis, K.A.; Meiri, S.; Thébault, E.; Sfenthourakis, S. Island species richness increases with habitat diversity. *Am. Nat.* **2009**, *174*, E205–E217.
43. Kadmon, R.; Allouche, O. Integrating the effects of area, isolation, and habitat heterogeneity on species diversity: A unification of island biogeography and niche theory. *Am. Nat.* **2007**, *170*, 443–454.
44. Rivard, D.H.; Poitevin, J.; Plasse, D.; Carleton, M.; Currie, D.J. Changing species richness and composition in Canadian National Parks. *Conserv. Biol.* **2000**, *14*, 1099–1109.
45. Yahner, R.H. Changes in wildlife communities near edges. *Conserv. Biol.* **1988**, *2*, 333–339.
46. Possingham, H.; Wilson, K.; Andelman, S.A.; Vynne, C. Protected areas: Goals, limitations, and design. In *Principles of Conservation Biology*, 3rd ed.; Sinauer Associates: Sunderland, MA, USA 2006; pp. 507–549.
47. Rebouças, R.; Dos Santos, M.M.; da Silva Martins, A.G.; Domingos, A.H.R.; Santos, I.; Toledo, L.F. Warming drives cryptic declines of amphibians in eastern Brazil. *Biol. Conserv.* **2021**, *256*, 109035.
48. Medina, R.G.; Lira-Noriega, A.; Araújo, E.; Ponssa, M.L. Potential effects of climate change on a Neotropical frog genus: Changes in the spatial diversity patterns of *Leptodactylus* (Anura, Leptodactylidae) and implications for their conservation. *Clim. Chang.* **2020**, *161*, 535–553.
49. Tiberti, R.; Mangiacotti, M.; Bennati, R. The upward elevational shifts of pond breeding amphibians following climate warming. *Biol. Conserv.* **2021**, *253*, 108911.
50. Forero-Medina, G.; Joppa, L.; Pimm, S.L. Constraints to species' elevational range shifts as climate changes. *Conserv. Biol.* **2011**, *25*, 163–171.
51. Chan-McLeod, A.C.A. Factors affecting the permeability of clearcuts to red-legged frogs. *J. Wildl. Manag.* **2003**, *663*–671.
52. Blaustein, A.R.; Belden, L.K.; Olson, D.H.; Green, D.M.; Root, T.L.; Kiesecker, J.M. Amphibian breeding and climate change. *Conserv. Biol.* **2001**, *15*, 1804–1809.
53. Reading, C. Linking global warming to amphibian declines through its effects on female body condition and survivorship. *Oecologia* **2007**, *151*, 125–131.
54. Leeper, D.A.; Taylor, B.E. Abundance, biomass and production of aquatic invertebrates in Rainbow Bay, a temporary wetland in South Carolina, USA. *Arch. Für Hydrobiol.* **1998**, *143*, 335–362.
55. Blaustein, A.R.; Walls, S.C.; Bancroft, B.A.; Lawler, J.J.; Searle, C.L.; Gervasi, S.S. Direct and indirect effects of climate change on amphibian populations. *Diversity* **2010**, *2*, 281–313.
56. Harvell, C.D.; Mitchell, C.E.; Ward, J.R.; Altizer, S.; Dobson, A.P.; Ostfeld, R.S.; Samuel, M.D. Climate warming and disease risks for terrestrial and marine biota. *Science* **2002**, *296*, 2158–2162.
57. Seimon, T.A.; Seimon, A.; Daszak, P.; Halloy, S.R.; Schloegel, L.M.; Aguilar, C.A.; Sowell, P.; Hyatt, A.D.; Konecky, B.; E SIMMONS, J. Upward range extension of Andean anurans and chytridiomycosis to extreme elevations in response to tropical deglaciation. *Glob. Chang. Biol.* **2007**, *13*, 288–299.
58. Gascon, C. *Amphibian Conservation Action Plan: Proceedings IUCN/SSC Amphibian Conservation Summit 2005*; IUCN: Gland, Switzerland, 2007.
59. Reed, D.H.; Frankham, R. Correlation between Fitness and Genetic Diversity. *Conserv. Biol.* **2003**, *17*, 230–237.
60. Neel, M.C.; Cummings, M.P. Effectiveness of conservation targets in capturing genetic diversity. *Conserv. Biol.* **2003**, *17*, 219–229.
61. Saura, S.; Bertzky, B.; Bastin, L.; Battistella, L.; Mandrici, A.; Dubois, G. Protected area connectivity: Shortfalls in global targets and country-level priorities. *Biol. Conserv.* **2018**, *219*, 53–67.
62. Kuussaari, M.; Bommarco, R.; Heikkinen, R.K.; Helm, A.; Krauss, J.; Lindborg, R.; Öckinger, E.; Pärtel, M.; Pino, J.; Rodà, F. Extinction debt: A challenge for biodiversity conservation. *Trends Ecol. Evol.* **2009**, *24*, 564–571.
63. Krosby, M.; Tewksbury, J.; Haddad, N.M.; Hoekstra, J. Ecological connectivity for a changing climate. *Conserv. Biol.* **2010**, *24*, 1686–1689.
64. Beale, C.M.; Baker, N.E.; Brewer, M.J.; Lennon, J.J. Protected area networks and savannah bird biodiversity in the face of climate change and land degradation. *Ecol. Lett.* **2013**, *16*, 1061–1068.
65. Ervin, J.; Sekhran, A.; Dinu, A.; Gidda, S.; Vergeichik, M.; Mee, J. *Protected Areas for the 21st Century: Lessons from UNDP/GEF's Portfolio*; UNDP: New York, NY, USA, 2010.
66. Laurance, W.F.; Useche, D.C.; Rendeiro, J.; Kalka, M.; Bradshaw, C.J.; Sloan, S.P.; Laurance, S.G.; Campbell, M.; Abernethy, K.; Alvarez, P. Averting biodiversity collapse in tropical forest protected areas. *Nature* **2012**, *489*, 290–294.
67. Juffe-Bignoli, D.; Burgess, N.D.; Bingham, H.; Belle, E.; De Lima, M.; Deguignet, M.; Bertzky, B.; Milam, A.; Martinez-Lopez, J.; Lewis, E. *Protected Planet Report 2014*; UNEP-WCMC: Cambridge, UK, 2014; p. 11.
